# Supplementary figures and images for: Evolution of the sheep industry and genetic research in the United States: opportunities for convergence in the twenty‐first century
Source: PubMed Central journal article supplement — Anim Genet. 2021 May 6;52(4):395–408. doi: 10.1111/age.13067 (PMC8360125; doi:10.1111/age.13067), 2021-05-06

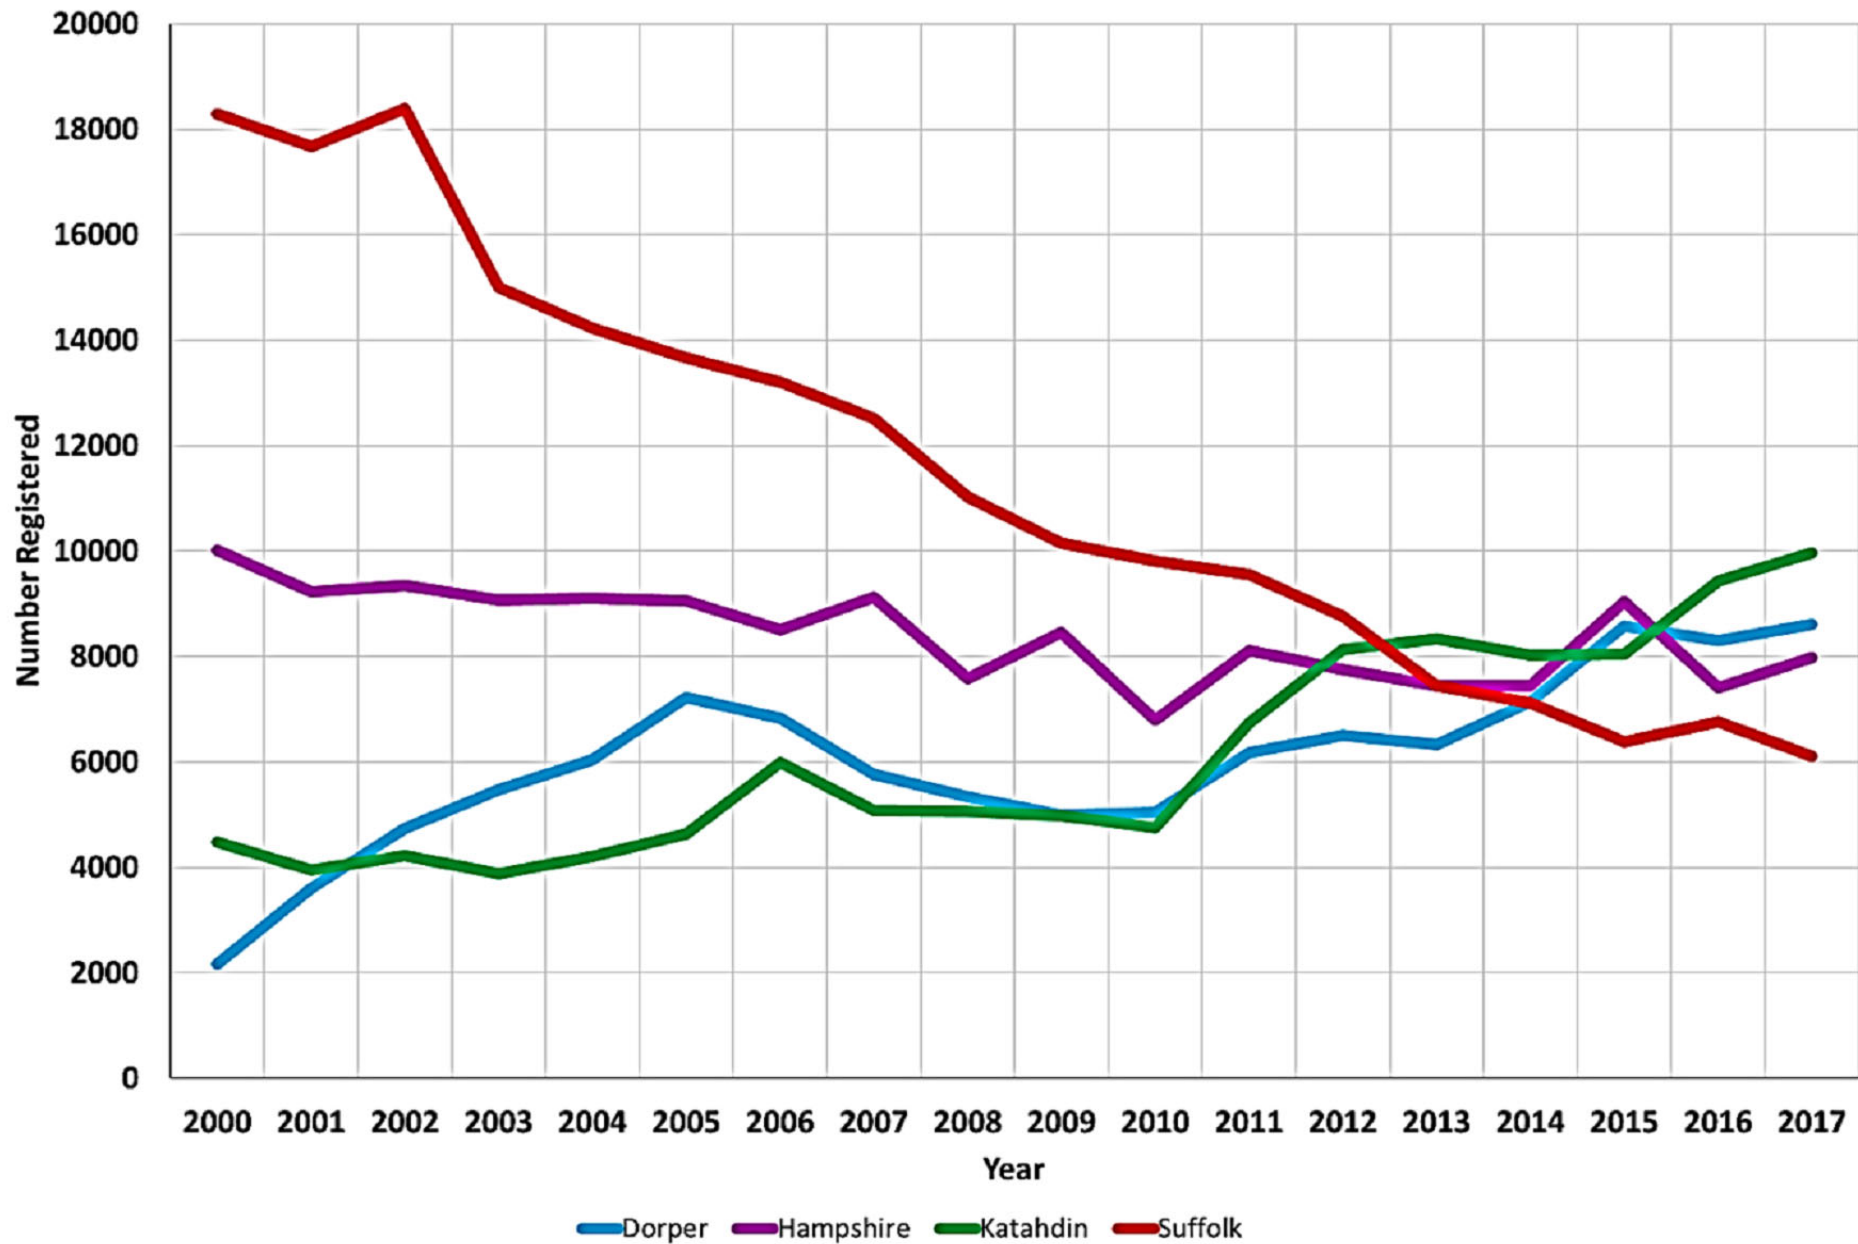

Supplement: AGE-52-395-s001.pdf [file AGE-52-395-s001.pdf]
